# Supplementary material for: Content Validation of the Prenatal Evaluation and Referral for Lactation (PEARL) Tool Using a Delphi Method
Source: Research Square preprint supplement (doi:10.21203/rs.3.rs-7943686/v1), 2025-11-22
Supplement: Supplementary file 1 [file 9a369fbbaa554aa1cfe7905d.pdf]

## Prenatal Evaluation and Referral for Lactation (PEARL)

Refer to an IBCLC lactation consultant or breastfeeding medicine provider if responses are in the **Risk Factor** column.

Refer for usual care and education for factors in the **Breastfeeding Education** column.

**Breastfeeding Education**

**Risk Factor for Referral**

### Maternal Health History

*Note:* Maternal age (>35) and health history can influence lactation success. Additional factors to screen and refer for are below.

|                                                                                                     |              |          |            |
|-----------------------------------------------------------------------------------------------------|--------------|----------|------------|
| Is there a history of breast cancer?                                                                | No           |          | <b>Yes</b> |
| Is there a history of diabetes? (Type I Type II)                                                    | No           |          | <b>Yes</b> |
| Was the pre-pregnancy BMI >30?                                                                      | No           |          | <b>Yes</b> |
| Were there documented hormonal disorders before pregnancy? (PCOS, infertility, menstrual disorders) | No           |          | <b>Yes</b> |
| Is there a history of thyroid disorder?                                                             | No           |          | <b>Yes</b> |
| Is there a history of hormonal medication use? (testosterone, progesterone, estrogen)               | No           |          | <b>Yes</b> |
| Is the preferred family planning method type:                                                       | Non-hormonal | Hormonal |            |
| Has patient screened positive for depression, trauma or abuse?                                      | No           |          | <b>Yes</b> |
| Document any additional screening tools used if any: EPDS, PHQ-9, ACEs, other:                      |              |          |            |

### Pregnancy Health History

*Note:* Some conditions detected during pregnancy may influence lactation success. Referral during pregnancy can establish anticipatory guidance from an IBCLC lactation consultant or breastfeeding medicine provider.

|                                                                                                                                            |               |  |                   |
|--------------------------------------------------------------------------------------------------------------------------------------------|---------------|--|-------------------|
| Is the gestational weight gain for BMI:                                                                                                    | Low or normal |  | <b>Excessive</b>  |
| Is there a current diagnosis of gestational diabetes?                                                                                      | No            |  | <b>Yes</b>        |
| Is there a current diagnosis of hypertension or preeclampsia?                                                                              | No            |  | <b>Yes</b>        |
| Are there known preterm birth risk factors? (high stress, multiples, birth defects, placenta complications, planned cesarean birth, other) | No            |  | <b>Yes</b>        |
| Is there current or potential use of medications contraindicated for lactation or milk production?                                         | No            |  | <b>Unsure/Yes</b> |

Breastfeeding History

Note: Breastfeeding education is recommended starting in pregnancy and a referral to an IBCLC lactation consultant or breastfeeding medicine provider is recommended for previous or anticipated lactation complications.

|                                                                                               |     |     |     |
|-----------------------------------------------------------------------------------------------|-----|-----|-----|
| Is this the first pregnancy?                                                                  | No  | Yes |     |
| Has breastfeeding knowledge or goals been discussed?                                          | Yes | No  |     |
| Have other lactation screening tools been used? (Breastfeeding Competency Scale (BCS), other) |     |     |     |
| Is there previous breastfeeding experience?                                                   | Yes | No  |     |
| Is there a history of breastfeeding difficulties?                                             | No  |     | Yes |
| If yes, what was the issue and how was it resolved?                                           |     |     |     |

Breast and Nipple Questions

Note: A care plan should be in place prior to birth if there are any breast/chest or nipple complications or concerns.

|                                                                                                                     |     |  |     |
|---------------------------------------------------------------------------------------------------------------------|-----|--|-----|
| Have there been noticeable breast changes during this pregnancy?                                                    | Yes |  | No  |
| Is there diagnosed breast hypoplasia? Left Right Both                                                               | No  |  | Yes |
| Is there any documented trauma, burns, or radiation to breasts?                                                     | No  |  | Yes |
| Is there a history of breast or chest surgery?                                                                      | No  |  | Yes |
| If yes, date and type:<br>(mastectomy, breast augmentation, breast reduction with or without nipple removal, other) |     |  |     |
| If yes, place of incision(s) (axillary, subareolar, inframammary, other):                                           |     |  |     |
| Is there normal nipple sensation/reaction since surgery?                                                            | Yes |  | No  |
| Inverted nipples that do not evert with compression or have graspability?                                           | No  |  | Yes |

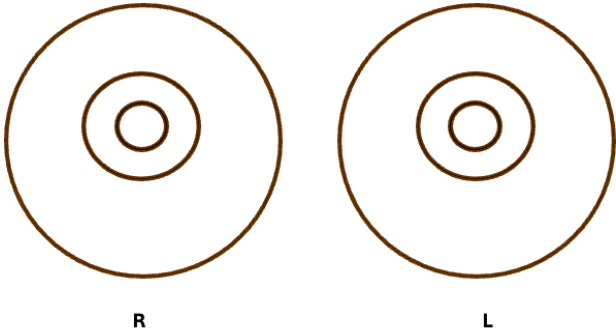

- ☐ Refer for Lactation Consultant Care
- ☐ Refer for Breastfeeding Education
